# Supplementary material for: Barium sulfate crystallization in non-aqueous solvent
Source: Royal Society of Chemistry journal article supplement (doi:10.1039/d0ce01664k), 2021-01-01

## Barium sulfate crystallization in non-aqueous solvent - Supporting Information

Ryan Fillingham<sup>1</sup>, Matthew Boon<sup>1</sup>, Shaghraf Javaid<sup>1</sup>, J. Alex Saunders<sup>1</sup>, Franca Jones<sup>1\*</sup>

1. Curtin Institute for Functional Molecules and Interfaces, School of Molecular and Life Sciences, Curtin University.

\*Mail: Curtin University, GPO Box U1987, Perth, Australia 6845.

Email: [F.Jones@curtin.edu.au](mailto:F.Jones@curtin.edu.au) Phone: 618 9266 7677

**SFig 1.** SEM images of barium sulfate particles formed in the presence of sulfuric acid in water

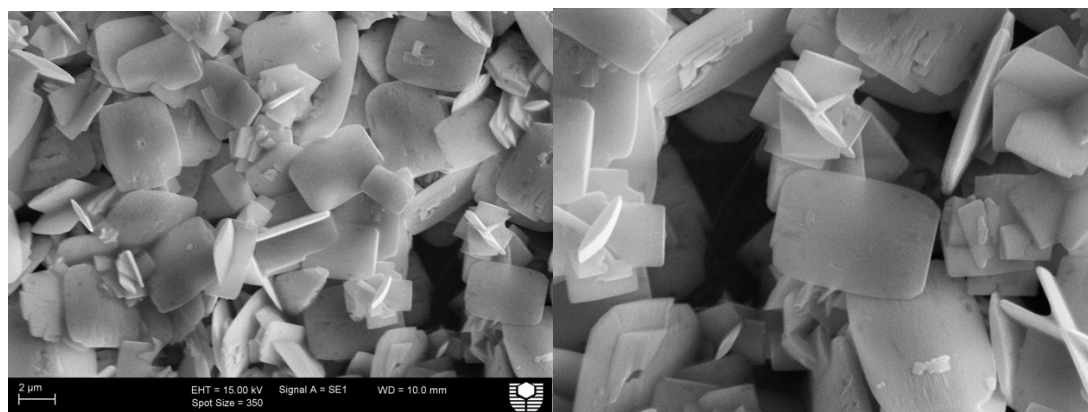

**SFig 2.** SEM image of barium sulfate particles formed in the presence of silicate at pH 10. (with permission from Jones *et al.* 2012)

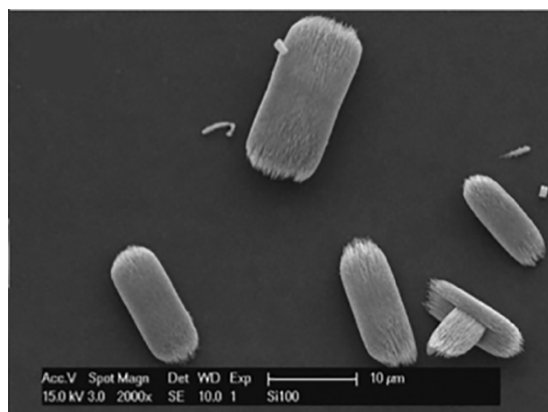

Jones, F.; Radomirovic, T.; Ogden, M. I. Effect of Solution Silicate on the Precipitation of Barium Sulfate. *Cryst. Growth Des.* **2012**, *12* (6), 3057–3065. <https://doi.org/10.1021/cg300263f>.

**SFig 3.** SEM image of barium sulfate morphology of (a) dendritic form<sup>#</sup> and (b) diamond-shape morphology

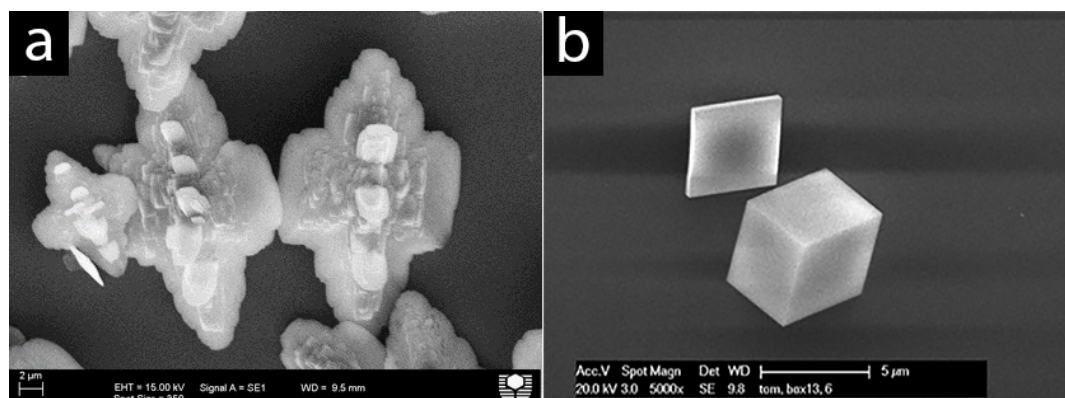

<sup>#</sup> reproduced with permission from Matthew Boon and Franca Jones “Barium Sulfate Crystallization from Synthetic Seawater”, *Cryst. Growth Des.* 2016, **16**, 4646–4657. DOI: 10.1021/acs.cgd.6b00729

**SFig. 4** EDX mapping of particles formed in low silica DMSO (The residual silica observed is believed to be a contaminant of the TEM grid.)

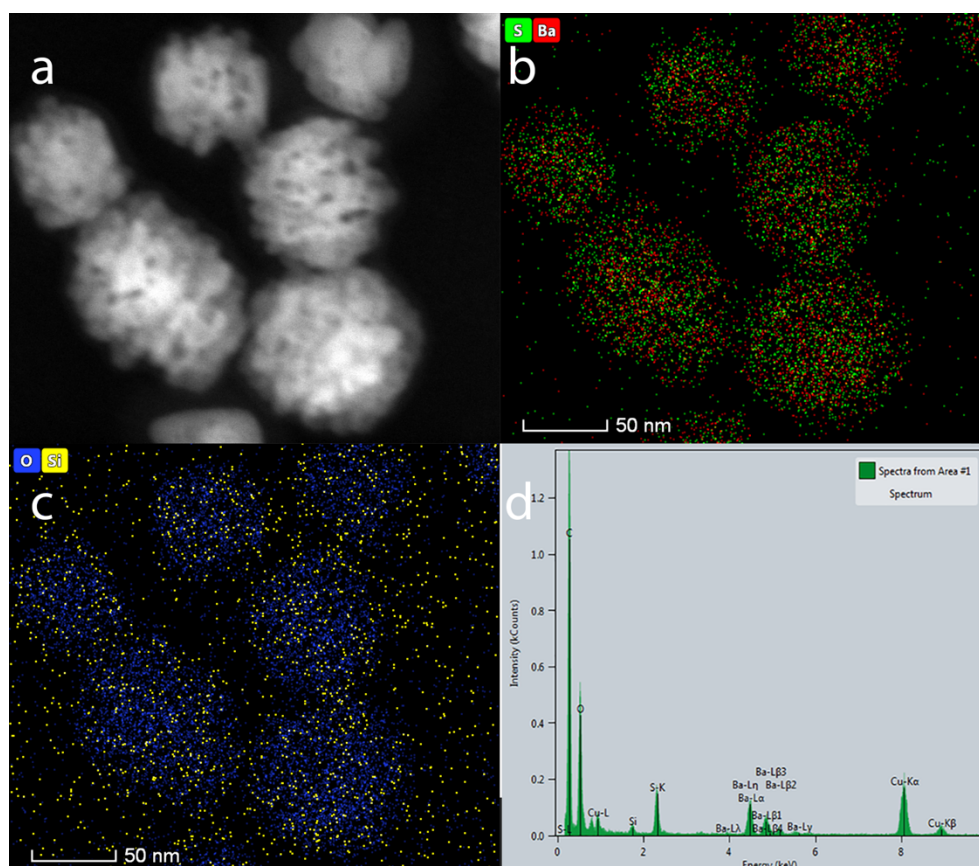

**SFig. 5** TEM images of BaSO<sub>4</sub> morphology found in the absence of silica

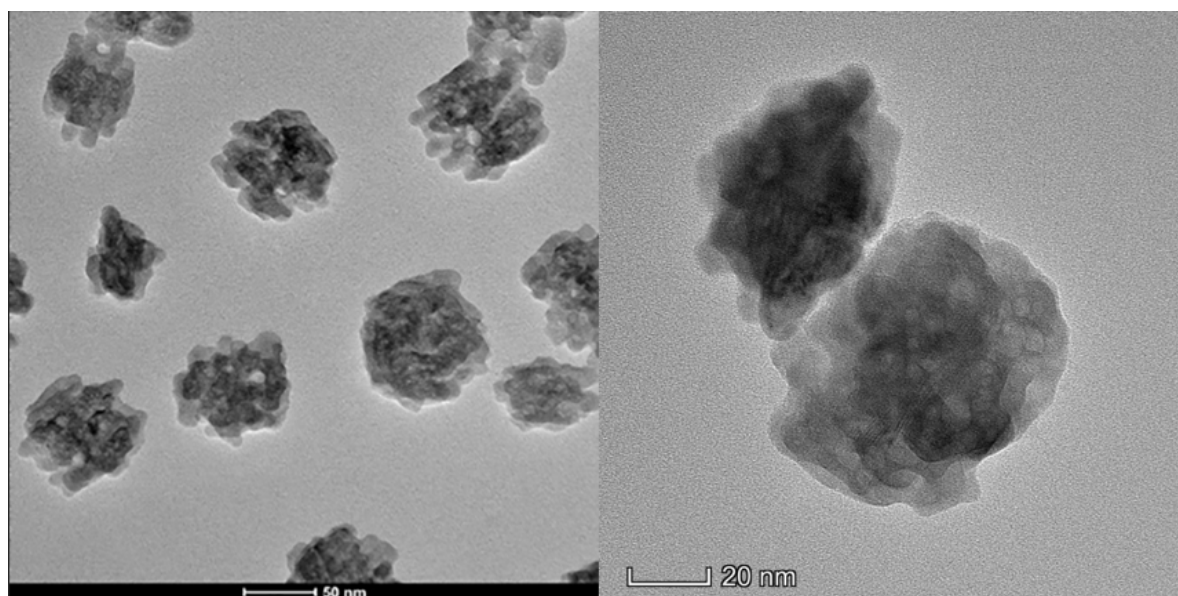

**SFig. 6** TGA of particles formed in DMSO

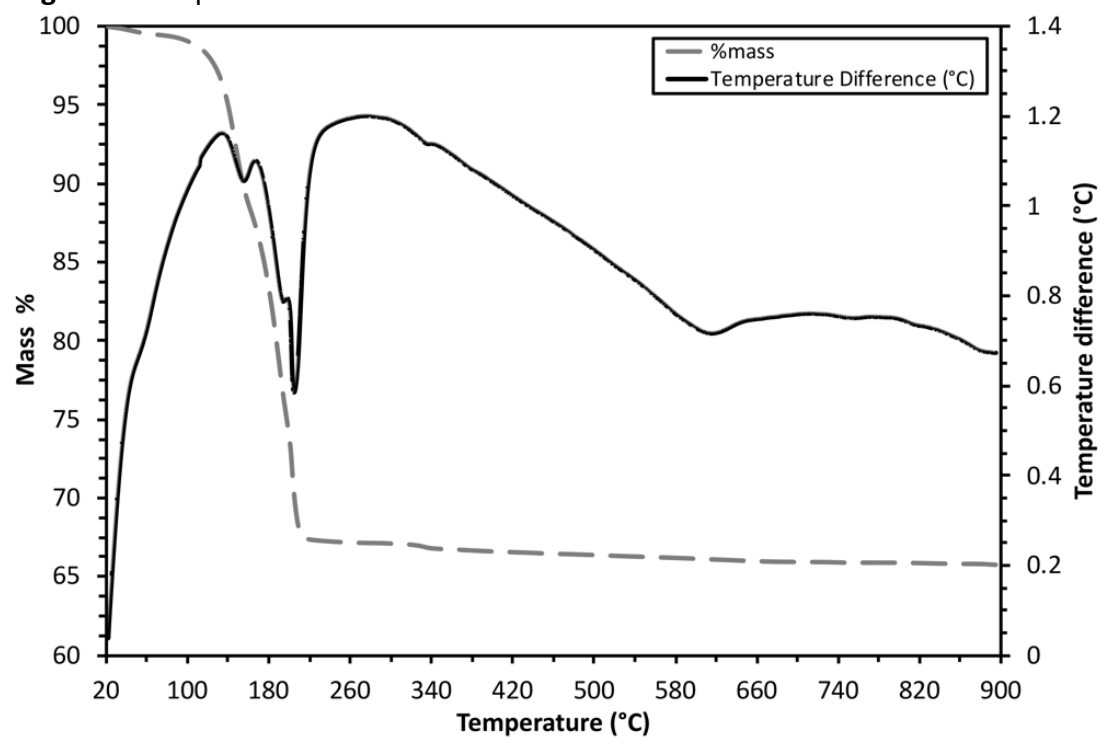



**SFig. 7** TEM images of BaSO<sub>4</sub> formed in DMSO (a, d, e 1 mM initial [Ba<sup>2+</sup>]). FFT is of area shown in d. Individual particles found (b, c). f) SEM image of BaSO<sub>4</sub> formed at 30mM initial [Ba<sup>2+</sup>]

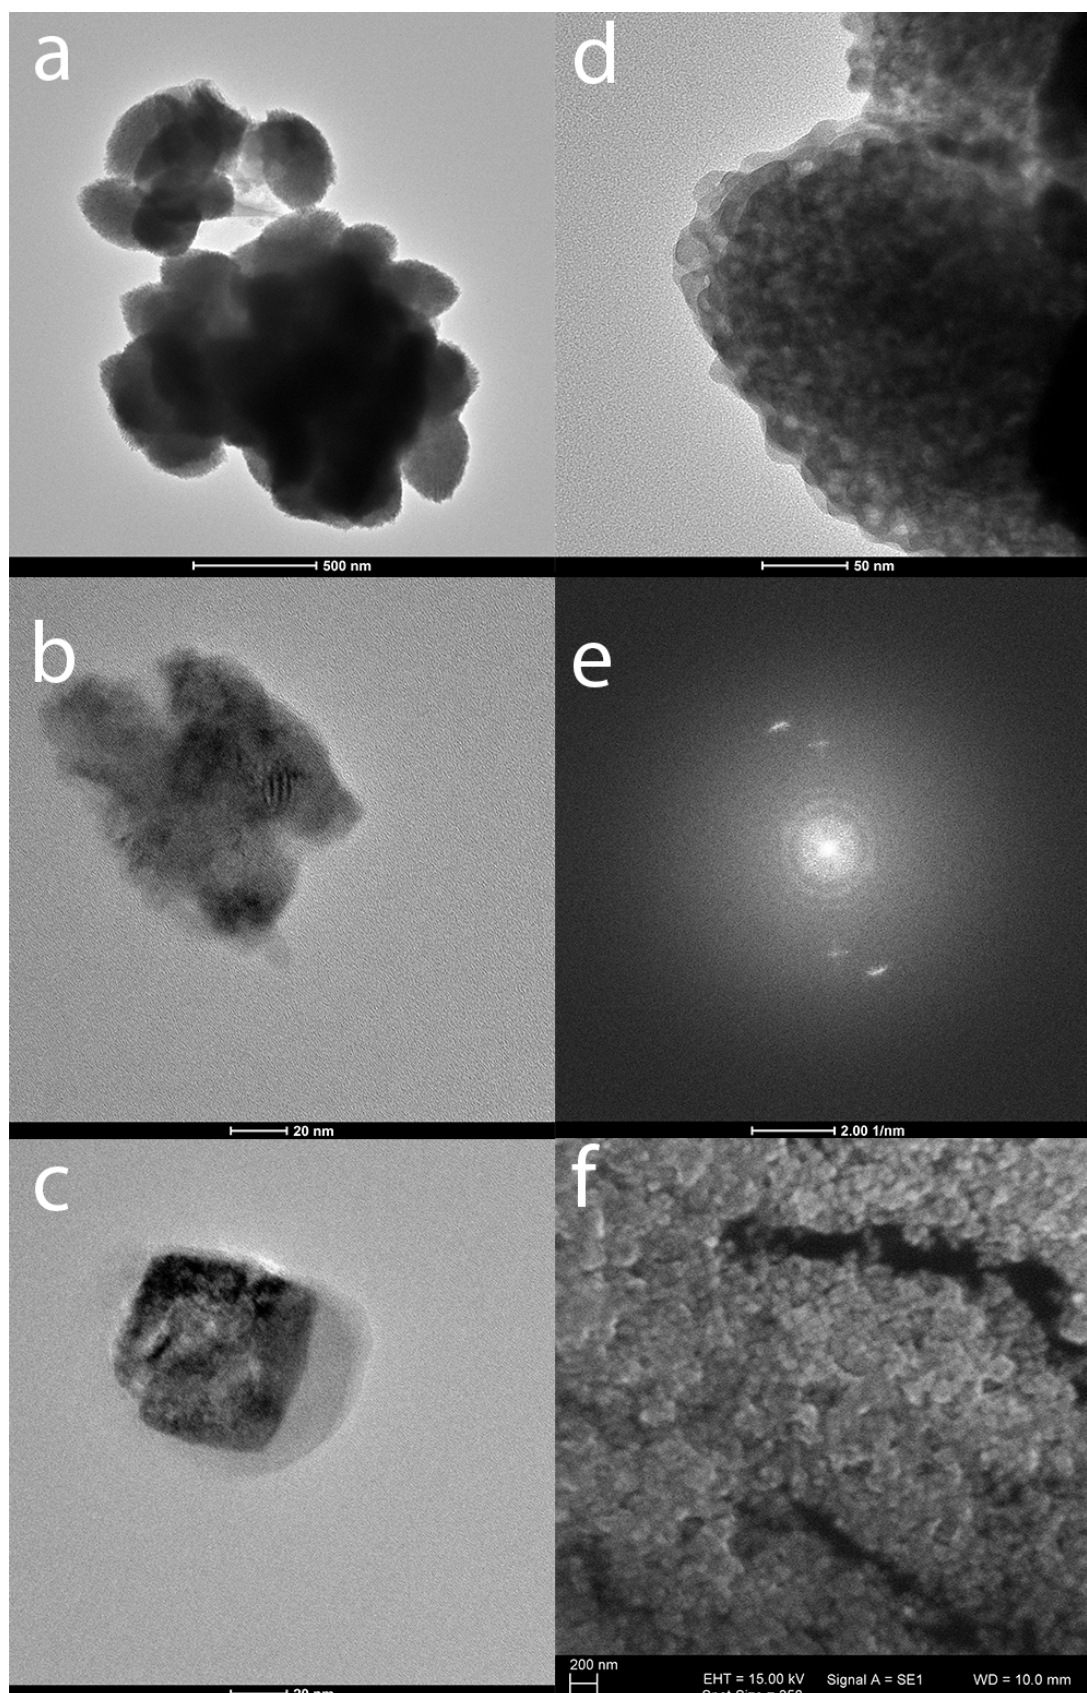

**SFig 8. EDX spectrum of solids formed in DMSO (1 mM initial  $[Ba^{2+}]$ )**

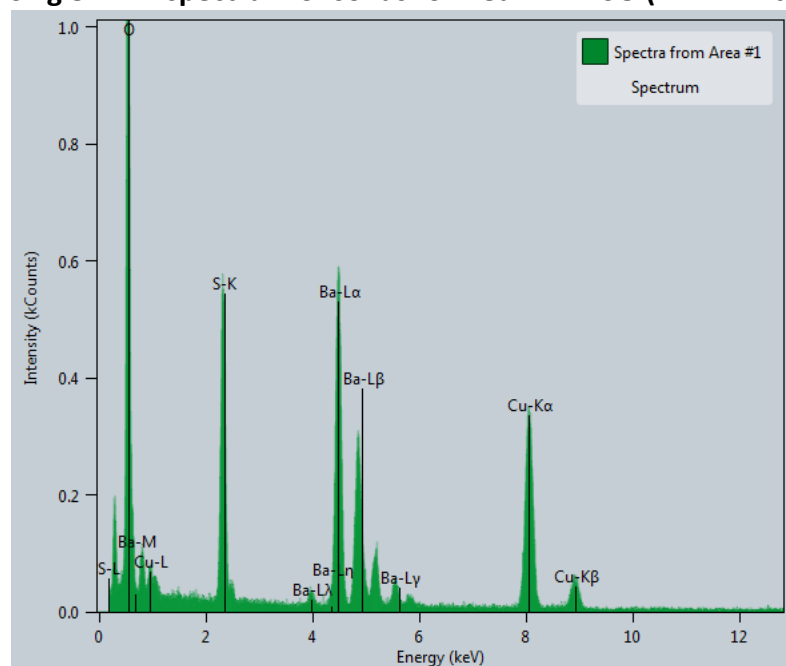

**SFig. 9** Amorphous material in neck of agglomerated particle on addition of water (FFT of area shown by blue box)

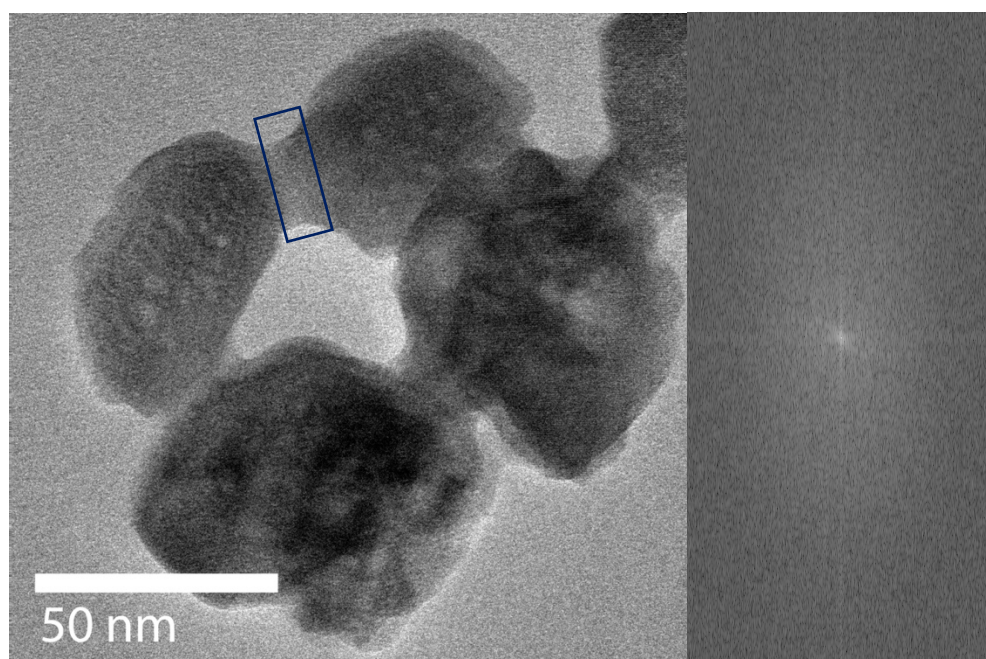

**SFig. 10** DLS graph showing nucleation behavior of BaSO<sub>4</sub> formation at 2 and 5 mM but with Ba nitrate in DMSO not water

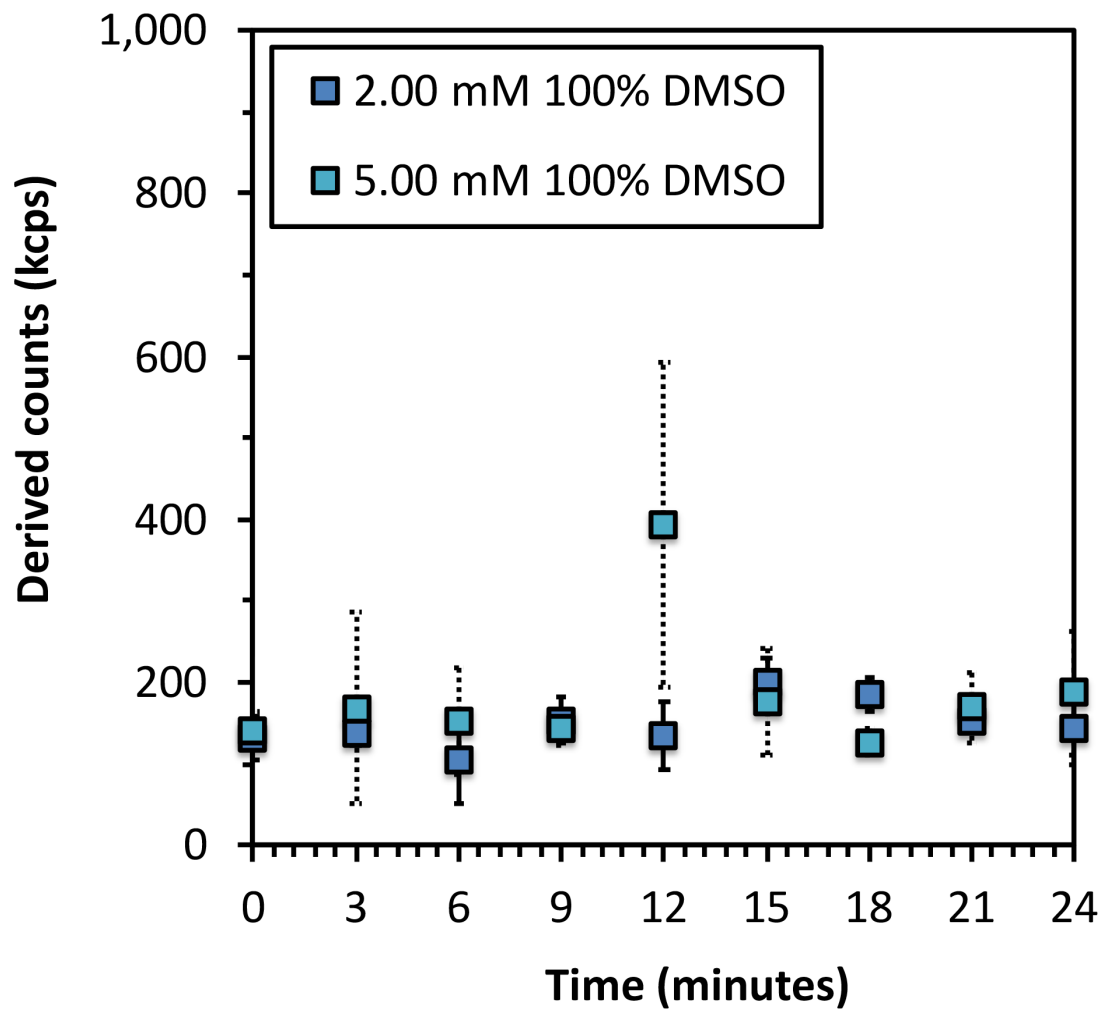



**SFig. 11** Close up of particles formed in the presence of (a) 60% (FFT of area shown) and (b) 80% water (FFT of whole particle shown in Figure 10).

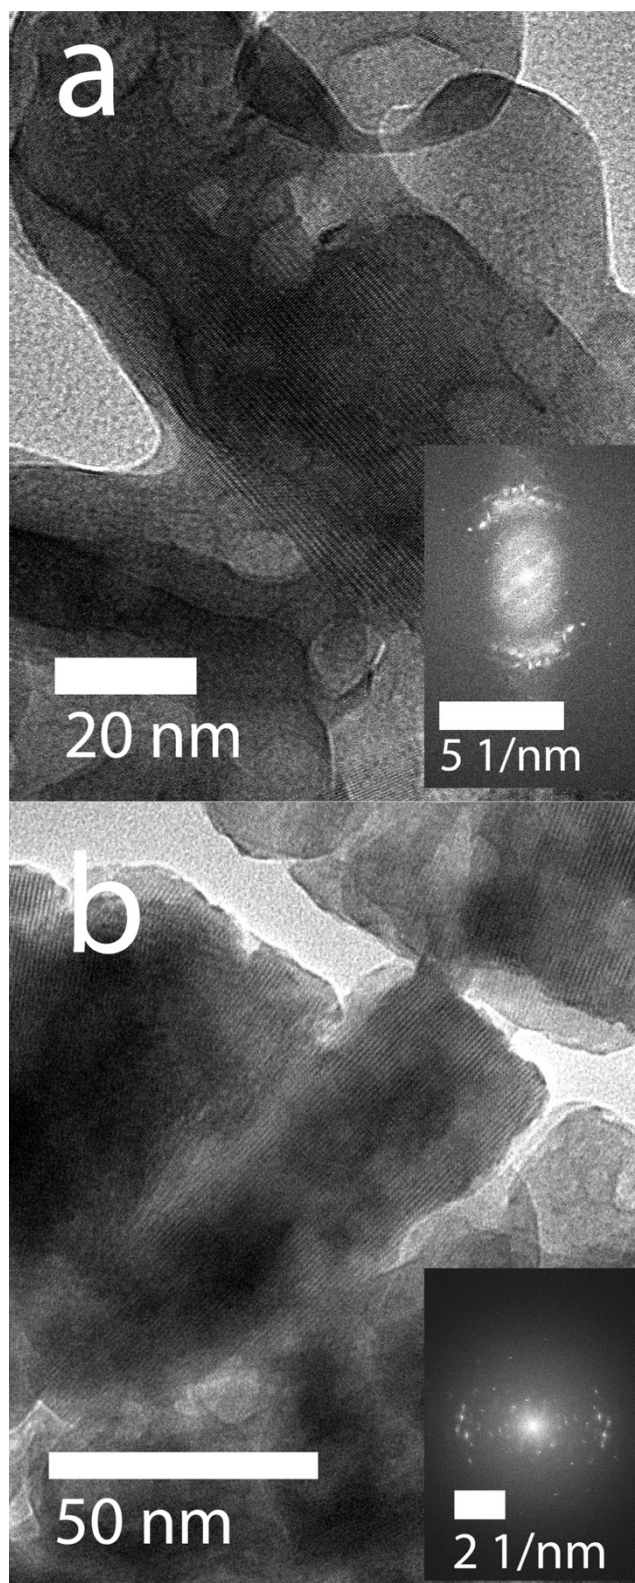

**SFig 12.** TEM of particles formed in  $100\pm 1\%$  DMSO

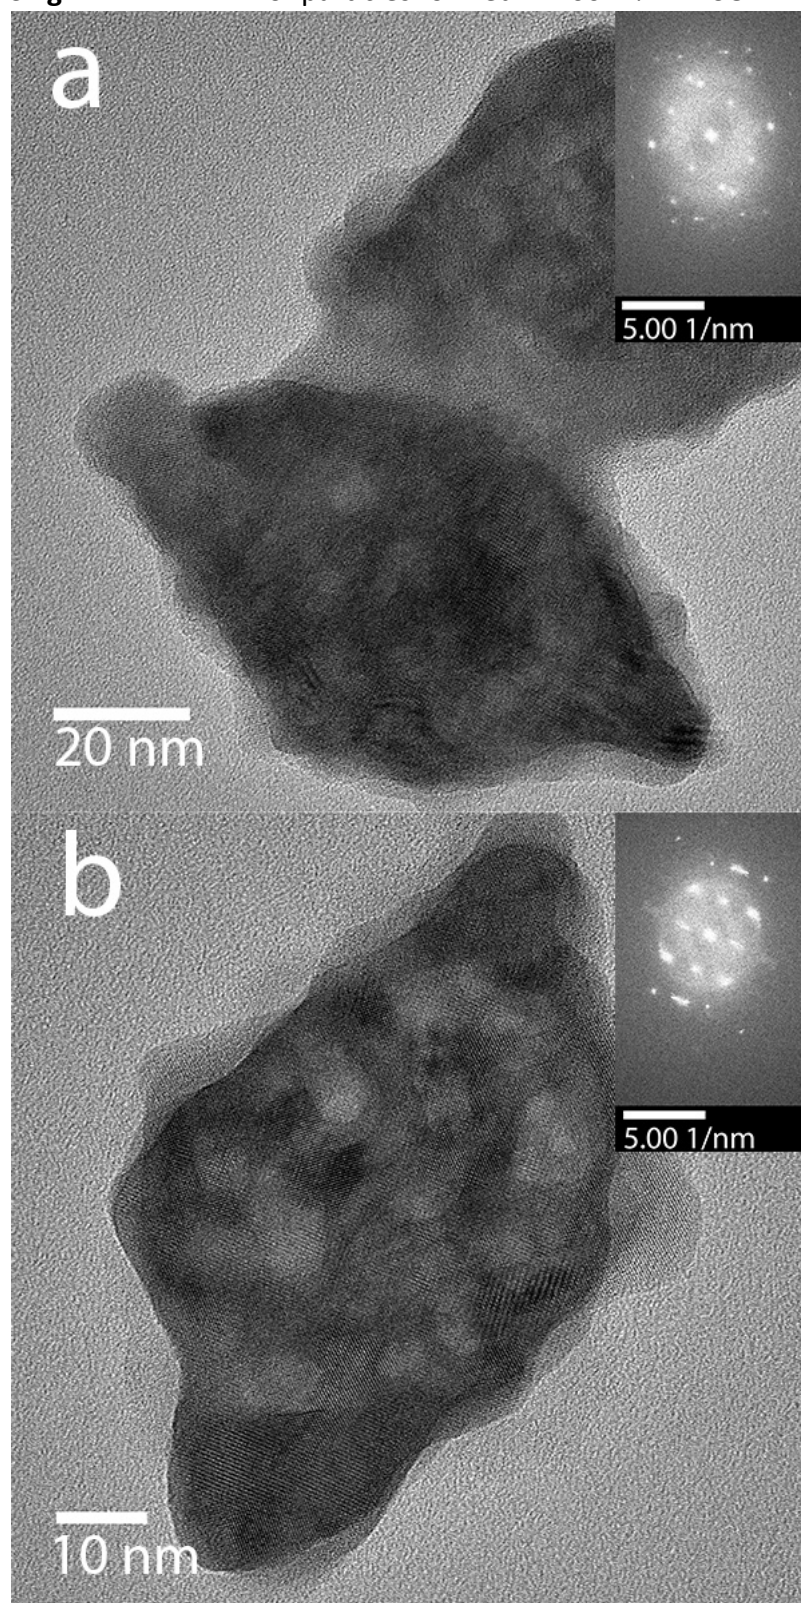

Supplement: d0ce01664k1.pdf [file d0ce01664k1.pdf]
